# Supplementary material for: Synthesis of vildagliptin conjugated metal nanoparticles for type II diabetes control: targeting the DPP-IV enzyme
Source: Royal Society of Chemistry journal article supplement (doi:10.1039/d0nj04202a), 2020-01-01
Supplement: d0nj04202a1.pdf [file d0nj04202a1.pdf]

## **Synthesis of Vildagliptin Conjugated Metal Nanoparticles for Type II Diabetes Control: Targeting DPP-IV Enzyme**

**Sharmeen Fayyaz<sup>1</sup>, Dania Ahmed<sup>2, 3\*</sup>, Sadia Khalid<sup>2</sup>, Sehrosh Naz Khan<sup>2</sup>, M. Raza Shah<sup>2</sup>,  
and M. Iqbal Choudhary<sup>1, 2, 4</sup>**

<sup>1</sup>Dr. Panjwani Center for Molecular Medicine and Drug Research, International Center for  
Chemical and Biological Sciences, University of Karachi, Karachi-75270, Pakistan

<sup>2</sup>H. E. J. Research Institute of Chemistry, International Center for Chemical and Biological  
Sciences, University of Karachi, Karachi-75270, Pakistan

<sup>3</sup>Department of biotechnology, Dow University of Health Sciences, Karachi-75270, Pakistan

<sup>4</sup>Department of Chemistry, Faculty of Science and Technology, Universitas Airlangga, Komplek  
Campus C, Surabaya 60115, Indonesia

*\*Correspondence; Dania Ahmed, Department of biotechnology, Dow University of Health Sciences, Karachi-75270.  
Email: [daniaahmed48@yahoo.com](mailto:daniaahmed48@yahoo.com)*

*Table S1: IR bands of Ag and Au conjugated vildagliptin and commercially available unbounded vildagliptin used as standard.*

| <b>Vildagliptin</b>                                                                     | <b>Vil-AgNPs</b>                                                                        | <b>Vil-AuNPs</b>                                                         |
|-----------------------------------------------------------------------------------------|-----------------------------------------------------------------------------------------|--------------------------------------------------------------------------|
| 3294 cm <sup>-1</sup> broad with medium intensity, overlapping signal of both OH and NH | 3408 cm <sup>-1</sup> broad with medium intensity, overlapping signal of both OH and NH | 3400 cm <sup>-1</sup> strong, broad overlapping signal of both OH and NH |
| 1658 cm <sup>-1</sup> carbonyl stretching strong and sharp                              | 1649 cm <sup>-1</sup> weak and broad                                                    | 1627 cm <sup>-1</sup> strong and broad                                   |
| 1155 cm <sup>-1</sup> C O single bond medium ,sharp                                     | 1033 cm <sup>-1</sup> medium broad                                                      | 1029 cm <sup>-1</sup> strong and broad                                   |
| 1404 cm <sup>-1</sup> sharp strong OH bending                                           | 1382 cm <sup>-1</sup> sharp and strong                                                  | 1407 cm <sup>-1</sup> medium broad                                       |
